# Supplementary material
Source: Springer Nature journal article supplement (https://www.springermedizin.de/resource/supplementary/12906_2013_1617_MOESM6_ESM.pdf/9522632)
Supplement: MOESM6 [file 9522632]

(A)

## Temporal up-pattern

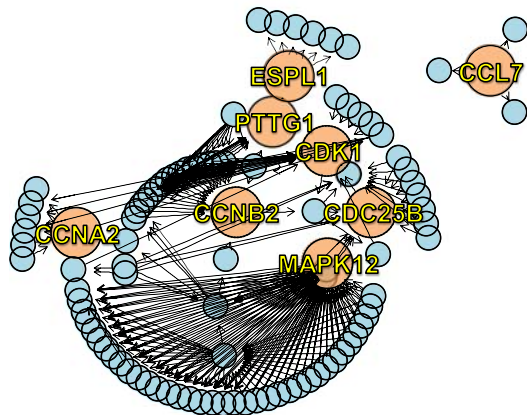

(B)

## Temporal down-pattern

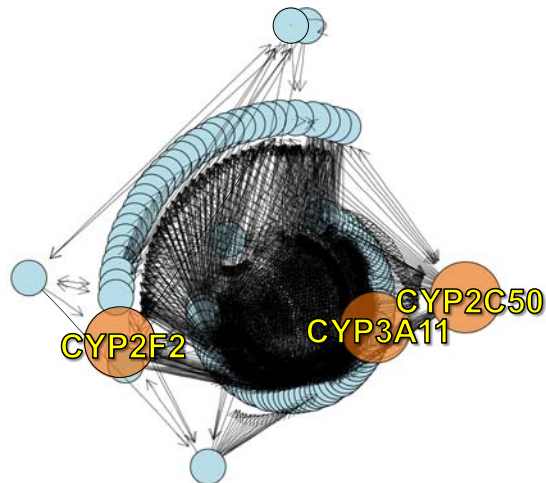

## Cell cycle pathway

Esp1  
Ccna2  
Ccnb2

## Osteoclast differentiation pathway

Cdc25b    Mapk12    MAPK pathway

Cdk1  
Pttg1

## Cytokine-cytokine receptor interaction pathway

Ccl7

## Metabolism of xenobiotics by cytochrome P450 pathway

Cyp2f2

Cyp3a11

Linoleic acid metabolism pathway  
Drug metabolism-cytochrome P450 pathway  
Retinol metabolism pathway

Cyp2c50

Serotonergic synapse pathway
